# Supplementary material
Source: PubMed Central journal article supplement (PMC4249504)

**Supplementary figure S1** Mass fragmentation patterns of TMS-derivatized sterol standards ergosterol (1), lanosterol (2), 14 $\alpha$ -methylergosta-8,24,(28)-dien-3 $\beta$ ,6 $\alpha$ -diol (3) and eburicol (4).

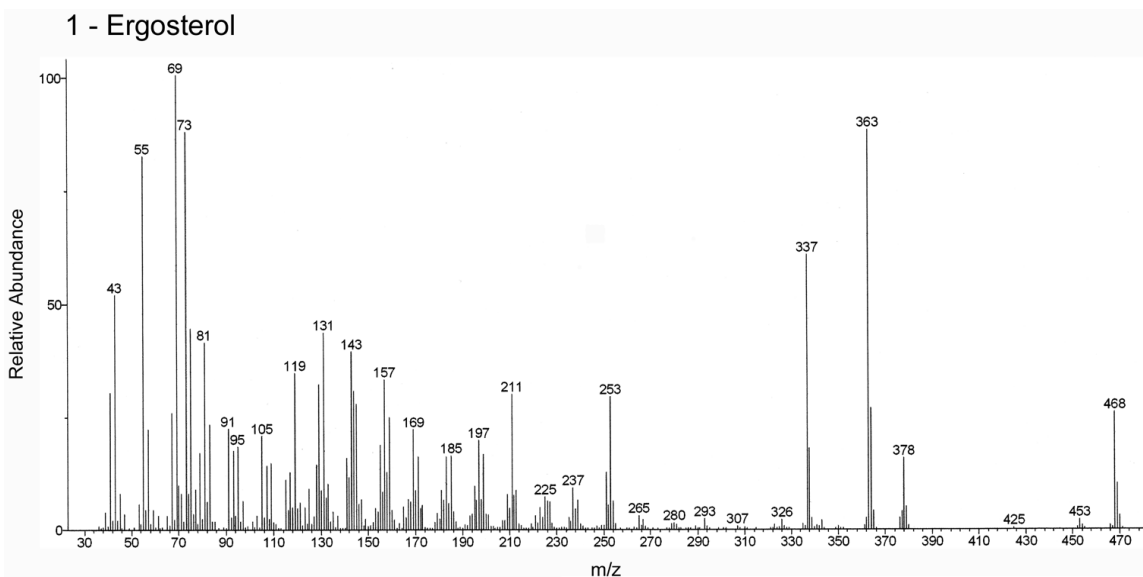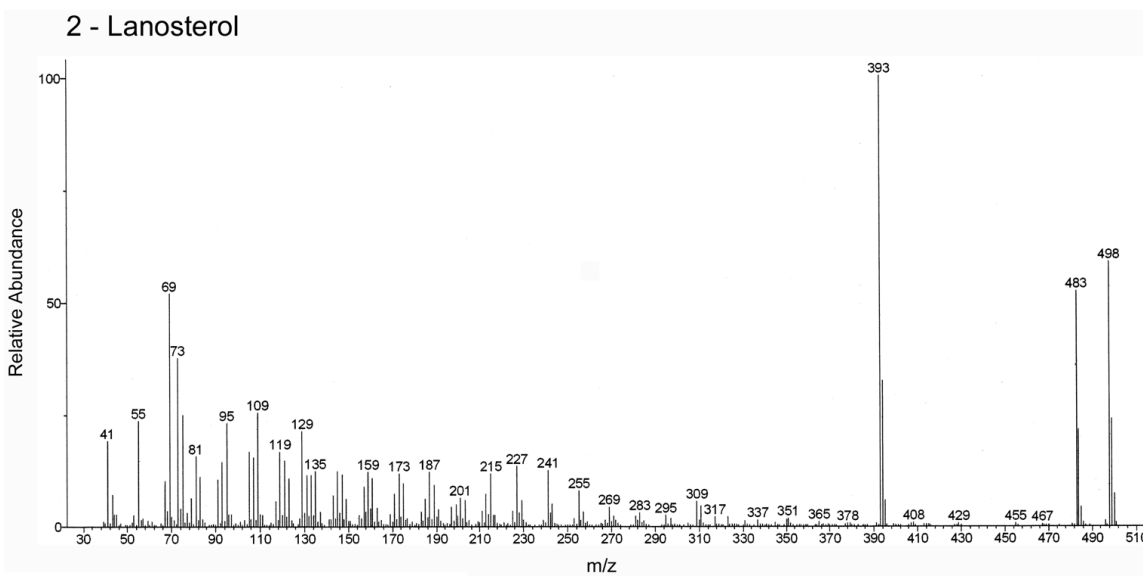

3 - 14 $\alpha$ -methylergosta-8,24(28)-dien-3 $\beta$ -6 $\alpha$ -diol

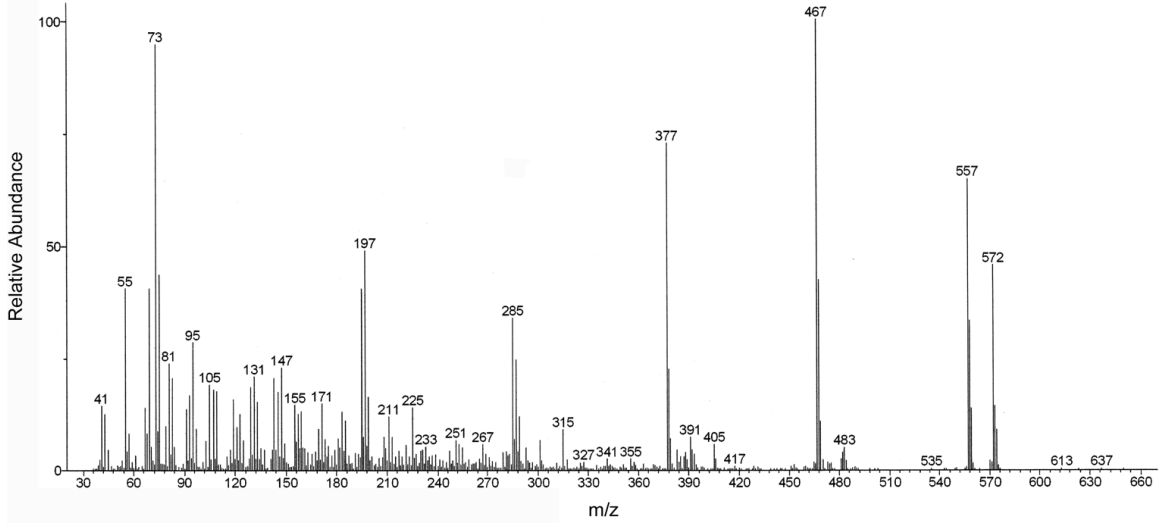

4 - Eburicol

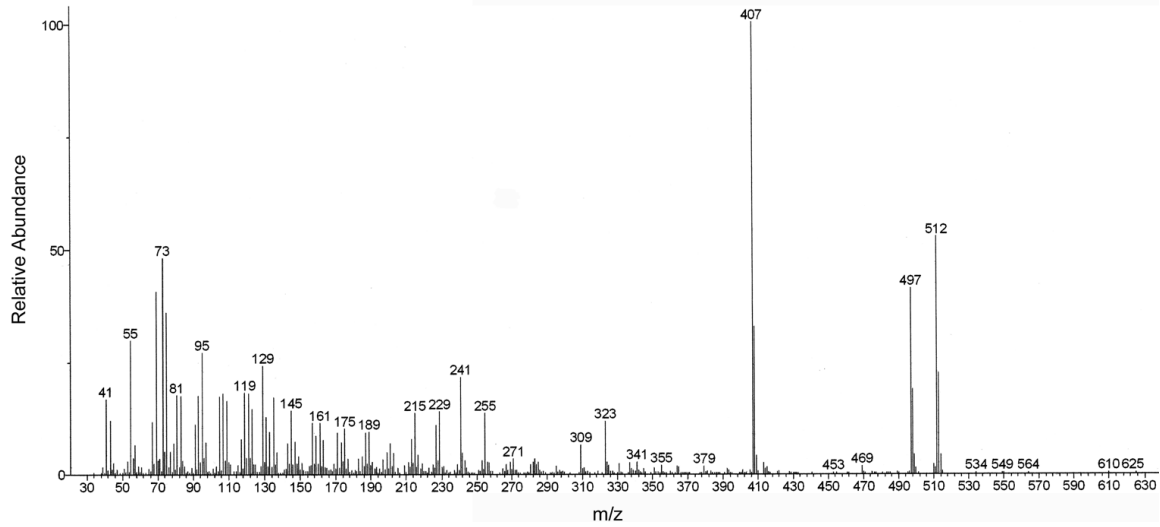

Supplement: AAC.03707-14_zac012143463so1.pdf [file AAC.03707-14_zac012143463so1.pdf]
